# Supplementary material for: Changes in optical properties and molecular composition of dissolved organic matter and formation of disinfection by-products during conventional water treatment processes
Source: Royal Society of Chemistry journal article supplement (doi:10.1039/d2ew00609j), 2022-11-15
Supplement: d2ew00609j1.pdf [file d2ew00609j1.pdf]

**Changes in optical properties and molecular composition of dissolved organic matter and formation of disinfection by-products during conventional water treatment processes**

Vitharuch Yuthawong<sup>\*a</sup>, Chatyapha Thongnueaha<sup>a</sup> and Phanwatt Phunsai<sup>b,c</sup>

<sup>a</sup> Department of Environmental Engineering, Faculty of Engineering, Kasetsart University, Bangkok 10900, Thailand

<sup>b</sup> Department of Environmental Engineering, Faculty of Engineering and Khon Kaen University, Khon Kaen 40002, Thailand

<sup>c</sup> Research Center for Environmental and Hazardous Substance Management, Khon Kaen University, Khon Kaen 40002, Thailand

\*Corresponding Author: Tel.: +660-2797-0999 ex 1009; e-mail address: [vitharuch.y@ku.th](mailto:vitharuch.y@ku.th)

**Contents in this Supporting Information.**

- 1. Figures**
- 2. Tables**
- 3. References**

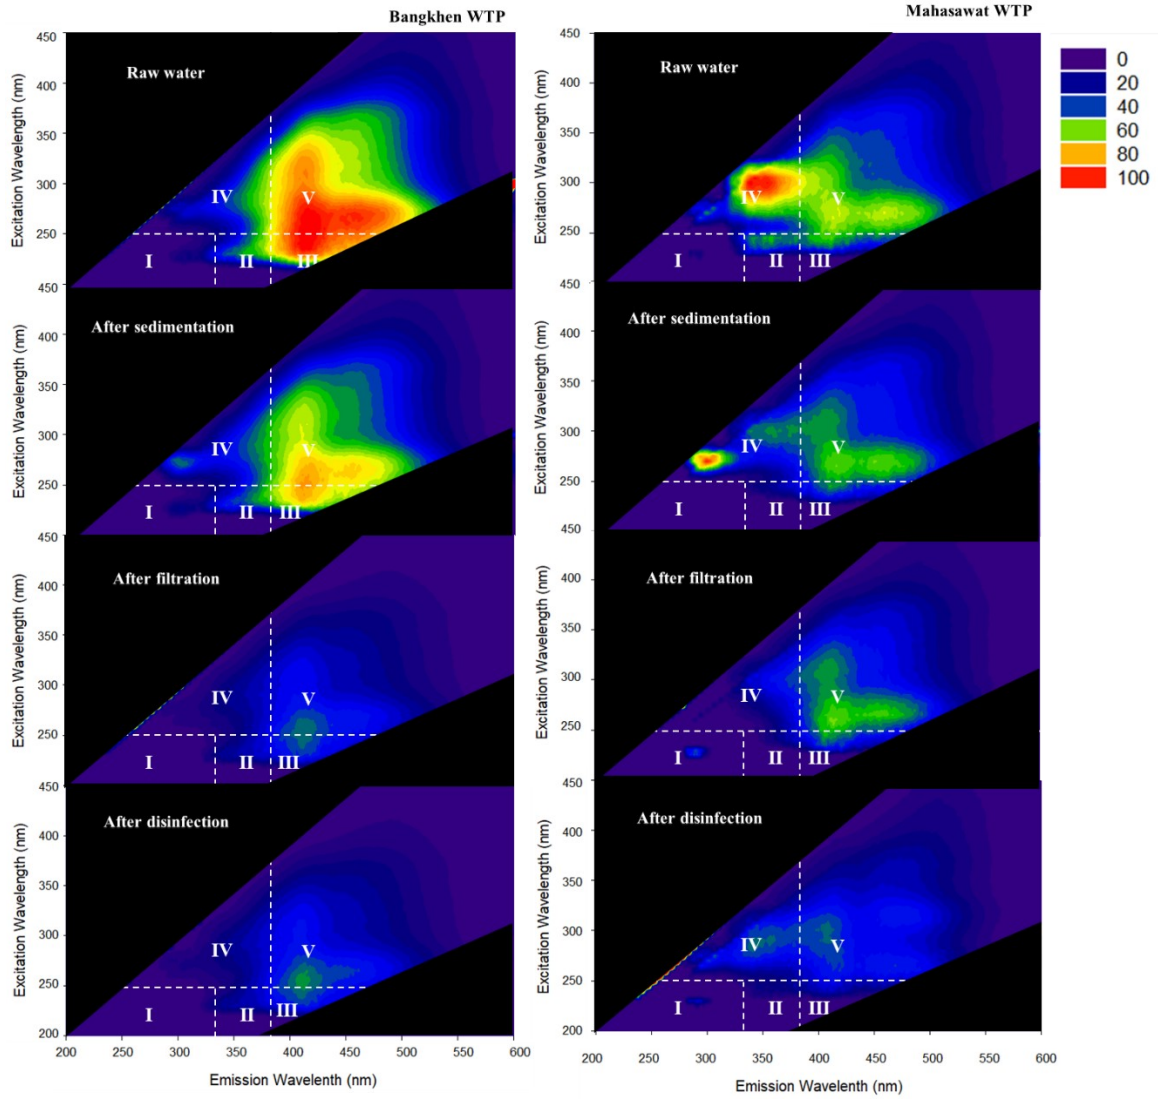

Figure S1 Excitation and emission spectra of BK-WTP and MH-WTP

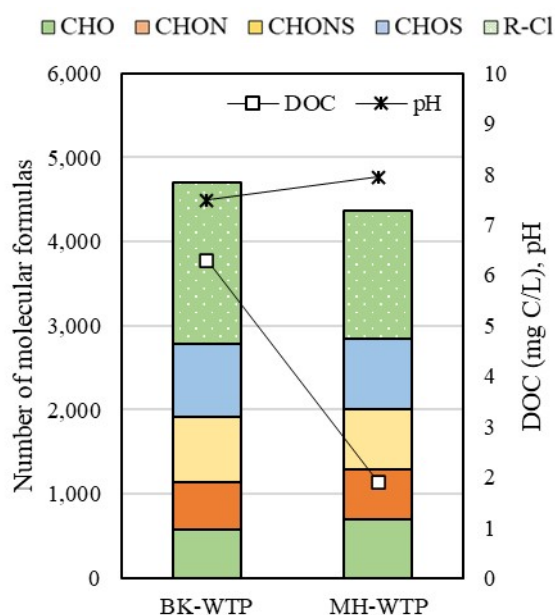

Figure S2 Number of molecular formulas of DOM in raw water samples of BK-WTP and MH-WTP

DOM components in raw water samples of BK-WTP and MH-WTP were classified according to heteroatoms assigned in the molecular formulas. The classification includes molecular formulas contain carbon, hydrogen and oxygen (CHO), CHO and nitrogen and sulfur heteroatoms (CHON, CHOS and CHONS) and molecular formulas containing chlorine (R-Cl). In total, 4701 and 4362 molecular formulas satisfied the assignment criteria for BK-WTP and MH-WTP (Figure S2), respectively. Collectively, the total absolute intensity of the molecular formulas accounted for  $7.66 \times 10^{10}$  and  $3.27 \times 10^{10}$  for BK-WTP and MH-WTP, respectively. This was quite consistent with DOC concentrations in the samples (6.3 mg/L for BK-WTP and 1.9 mg/L for MH-WTP).

DOM in RW of Both WTPs had similar portions of CHO, CHON, CHOS, CHONS and R-Cl. For BK-WTP, the portions were 12.3%, 12.0%, 18.5%, 16.4%, and 40.8% for CHO, CHON, CHOS, CHONS, and R-Cl, respectively. For MH-WTP, the portions were 16.0%, 13.5%, 19.1%, 16.5% and 34.9% for CHO, CHON, CHOS, CHONS and R-Cl, respectively. The largest portion of both WTPs was R-Cl and CHOS components. The presence of R-Cl in our samples were not surprising since the raw water samples were from the rivers which retrieve tremendously diverse DOM sources (wastewater effluent and agricultural runoff) along the lengths of the rivers. Moreover, R-Cl can naturally be produced from biological processes number of organisms ranging from bacteria, algae, lichens, plants and insects<sup>1,2</sup>.

## References

1. G. Öberg, The natural chlorine cycle—fitting the scattered pieces, *Applied microbiology and biotechnology*, 2002, **58**, 565-581.
2. G. W. Gribble, The diversity of naturally produced organohalogens, *Chemosphere*, 2003, **52**, 289-297.

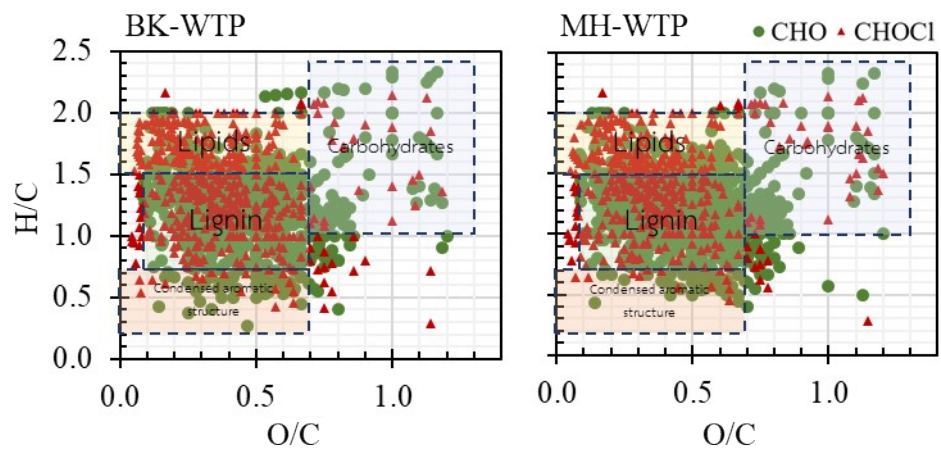

Figure S2-S3 van Krevelen diagrams of raw water samples of BK-WTP and MH-WTP

Table S1 Molecular characteristics of DOM components classified according to changes between two adjacent processes of BK-WTP

|                     |              | BK-WTP      |           |          |           |              | ANOVA <i>p</i> -value |
|---------------------|--------------|-------------|-----------|----------|-----------|--------------|-----------------------|
|                     |              | Disappeared | Decreased | Constant | Increased | Newly formed |                       |
| After sedimentation | Total number | 191         | 469       | 295      | 78        | 99           | -                     |
|                     | H/C          | 1.30        | 1.28      | 1.28     | 1.25      | 1.26         | 0.84                  |
|                     | O/C          | 0.45        | 0.45      | 0.42     | 0.45      | 0.51         | <0.05                 |
|                     | DBE          | 5.70        | 5.59      | 5.82     | 5.46      | 5.81         | 0.86                  |
|                     | DBE-O        | -0.38       | -0.12     | 0.09     | -0.26     | -0.65        | 0.43                  |
|                     | AI           | 0.60        | 0.23      | 0.23     | 0.13      | 0.32         | <0.05                 |
|                     | MW           | 327.07      | 294.15    | 304.87   | 291.57    | 298.87       | <0.05                 |
| After filtration    | Total number | 121         | 113       | 393      | 314       | 160          | -                     |
|                     | H/C          | 1.33        | 1.35      | 1.30     | 1.21      | 1.28         | <0.05                 |
|                     | O/C          | 0.45        | 0.42      | 0.42     | 0.48      | 0.44         | <0.05                 |
|                     | DBE          | 5.56        | 6.10      | 5.86     | 5.35      | 5.09         | <0.05                 |
|                     | DBE-O        | -0.63       | -0.27     | 0.17     | -0.23     | -0.18        | 0.22                  |
|                     | AI           | 0.24        | 0.21      | 0.20     | 0.26      | 0.27         | 0.87                  |
|                     | MW           | 307.78      | 326.30    | 298.59   | 282.69    | 303.98       | <0.05                 |
| After disinfection  | Total number | 49          | 59        | 763      | 109       | 65           | -                     |
|                     | H/C          | 1.26        | 1.27      | 1.28     | 1.20      | 1.33         | 0.21                  |
|                     | O/C          | 0.44        | 0.48      | 0.44     | 0.48      | 0.47         | 0.29                  |
|                     | DBE          | 6.00        | 5.44      | 5.57     | 5.66      | 4.94         | <0.05                 |
|                     | DBE-O        | -0.08       | -0.34     | -0.07    | 0.09      | -1.26        | <0.05                 |
|                     | AI           | 0.25        | 0.10      | 0.23     | 0.30      | 0.39         | 0.54                  |
|                     | MW           | 313.85      | 286.52    | 299.20   | 284.83    | 325.60       | <0.05                 |

Table S2 Molecular characteristics of DOM components classified according to changes between two adjacent processes of MH-WTP

|                     |              | MH-WTP      |           |          |           |              |                       |
|---------------------|--------------|-------------|-----------|----------|-----------|--------------|-----------------------|
|                     |              | Disappeared | Decreased | Constant | Increased | Newly formed | ANOVA <i>p</i> -value |
| After sedimentation | Total number | 118         | 279       | 527      | 173       | 66           | -                     |
|                     | H/C          | 1.33        | 1.29      | 1.29     | 1.20      | 1.11         | <0.05                 |
|                     | O/C          | 0.48        | 0.44      | 0.45     | 0.47      | 0.51         | 0.15                  |
|                     | DBE          | 6.93        | 6.64      | 5.77     | 4.80      | 5.11         | <0.05                 |
|                     | DBE-O        | -0.94       | -0.17     | -0.22    | 0.01      | -0.08        | 0.23                  |
|                     | AI           | 0.56        | 0.21      | 0.28     | 0.25      | 0.19         | <0.05                 |
|                     | MW           | 382.39      | 339.24    | 302.48   | 243.41    | 264.90       | <0.05                 |
| After filtration    | Total number | 121         | 139       | 607      | 178       | 68           | -                     |
|                     | H/C          | 1.19        | 1.27      | 1.27     | 1.27      | 1.38         | <0.05                 |
|                     | O/C          | 0.52        | 0.46      | 0.44     | 0.45      | 0.42         | <0.05                 |
|                     | DBE          | 6.62        | 5.83      | 5.69     | 5.60      | 5.53         | <0.05                 |
|                     | DBE-O        | -0.45       | -0.31     | -0.04    | -0.26     | -0.50        | 0.63                  |
|                     | AI           | 0.33        | 0.15      | 0.30     | 0.10      | 0.12         | <0.05                 |
|                     | MW           | 325.49      | 301.10    | 298.04   | 289.32    | 328.55       | <0.05                 |
| After disinfection  | Total number | 154         | 161       | 211      | 466       | 125          | -                     |
|                     | H/C          | 1.40        | 1.43      | 1.29     | 1.18      | 1.07         | <0.05                 |
|                     | O/C          | 0.40        | 0.38      | 0.42     | 0.49      | 0.53         | <0.05                 |
|                     | DBE          | 5.36        | 4.78      | 6.15     | 5.89      | 6.37         | <0.05                 |
|                     | DBE-O        | -0.27       | -0.37     | 0.15     | -0.17     | 0.14         | 0.53                  |
|                     | AI           | 0.30        | 0.36      | 0.29     | 0.14      | 0.28         | <0.05                 |
|                     | MW           | 318.59      | 317.51    | 314.52   | 279.10    | 295.19       | <0.05                 |

Table S3 List of DBPs detected in BK-WTP and MH-WTP

| No. | DBP formula                                                   | Theoretical molecular weight (Da) | Experimental molecular weight (Da) | Mass error (ppm) | Detected in WTP | Also reported in references                                       |
|-----|---------------------------------------------------------------|-----------------------------------|------------------------------------|------------------|-----------------|-------------------------------------------------------------------|
| 1   | C <sub>2</sub> H <sub>2</sub> OCl <sub>2</sub>                | 111.9483                          | 111.9485                           | 2.05             | MH-WTP          |                                                                   |
| 2   | C <sub>4</sub> H <sub>3</sub> O <sub>3</sub> Cl               | 133.9771                          | 133.9767                           | 2.63             | MH-WTP          |                                                                   |
| 3   | C <sub>3</sub> H <sub>3</sub> O <sub>3</sub> Cl               | 147.9927                          | 147.9924                           | 2.39             | MH-WTP          |                                                                   |
| 4   | C <sub>4</sub> H <sub>4</sub> O <sub>2</sub> Cl <sub>2</sub>  | 153.9588                          | 153.9583                           | 3.74             | MH-WTP          |                                                                   |
| 5   | C <sub>6</sub> H <sub>5</sub> O <sub>3</sub> Cl               | 159.9927                          | 159.9925                           | 1.64             | MH-WTP          |                                                                   |
| 6   | C <sub>3</sub> H <sub>6</sub> O <sub>2</sub> Cl <sub>2</sub>  | 167.9745                          | 167.9742                           | 1.70             | MH-WTP          |                                                                   |
| 7   | C <sub>3</sub> H <sub>8</sub> O <sub>2</sub> Cl <sub>2</sub>  | 169.9901                          | 169.9894                           | 4.09             | BK-WTP          |                                                                   |
| 8   | C <sub>8</sub> H <sub>7</sub> O <sub>2</sub> Cl               | 170.0135                          | 170.0138                           | 1.78             | BK-WTP          |                                                                   |
| 9   | C <sub>8</sub> H <sub>9</sub> O <sub>2</sub> Cl               | 172.0291                          | 172.0288                           | 1.85             | MH-WTP          |                                                                   |
| 10  | C <sub>7</sub> H <sub>7</sub> O <sub>3</sub> Cl               | 174.0084                          | 174.0084                           | 0.33             | BK-WTP          |                                                                   |
| 11  | C <sub>6</sub> H <sub>2</sub> O <sub>2</sub> Cl <sub>2</sub>  | 175.9432                          | 175.9440                           | 4.46             | MH-WTP          |                                                                   |
| 12  | C <sub>6</sub> H <sub>8</sub> O <sub>2</sub> Cl <sub>2</sub>  | 181.9901                          | 181.9896                           | 3.17             | Both WTPs       |                                                                   |
| 13  | C <sub>3</sub> H <sub>6</sub> O <sub>3</sub> Cl <sub>2</sub>  | 183.9694                          | 183.9685                           | 4.79             | BK-WTP          |                                                                   |
| 14  | C <sub>4</sub> H <sub>3</sub> O <sub>4</sub> Cl               | 185.9720                          | 185.9715                           | 2.79             | Both WTPs       |                                                                   |
| 15  | C <sub>9</sub> H <sub>11</sub> O <sub>2</sub> Cl              | 186.0448                          | 186.0453                           | 2.91             | MH-WTP          |                                                                   |
| 16  | C <sub>4</sub> H <sub>3</sub> O <sub>2</sub> Cl <sub>3</sub>  | 187.9199                          | 187.9203                           | 2.27             | MH-WTP          |                                                                   |
| 17  | C <sub>8</sub> H <sub>9</sub> O <sub>3</sub> Cl               | 188.0240                          | 188.0243                           | 1.58             | MH-WTP          |                                                                   |
| 18  | C <sub>7</sub> H <sub>7</sub> O <sub>4</sub> Cl               | 190.0033                          | 190.0026                           | 3.88             | MH-WTP          |                                                                   |
| 19  | C <sub>3</sub> H <sub>6</sub> O <sub>4</sub> Cl <sub>2</sub>  | 199.9643                          | 199.9633                           | 4.98             | MH-WTP          |                                                                   |
| 20  | C <sub>11</sub> H <sub>3</sub> O <sub>2</sub> Cl              | 201.9822                          | 201.9816                           | 2.56             | MH-WTP          |                                                                   |
| 21  | C <sub>8</sub> H <sub>6</sub> O <sub>2</sub> Cl <sub>2</sub>  | 203.9745                          | 203.9754                           | 4.48             | MH-WTP          |                                                                   |
| 22  | C <sub>8</sub> H <sub>9</sub> O <sub>4</sub> Cl               | 204.0189                          | 204.0189                           | 0.01             | MH-WTP          |                                                                   |
| 23  | C <sub>8</sub> H <sub>8</sub> O <sub>2</sub> Cl <sub>2</sub>  | 205.9901                          | 205.9893                           | 3.91             | MH-WTP          |                                                                   |
| 24  | C <sub>7</sub> H <sub>11</sub> O <sub>5</sub> Cl              | 210.0295                          | 210.0291                           | 2.06             | MH-WTP          |                                                                   |
| 25  | C <sub>11</sub> H <sub>11</sub> O <sub>2</sub> Cl             | 210.0448                          | 210.0447                           | 0.51             | MH-WTP          |                                                                   |
| 26  | C <sub>9</sub> H <sub>5</sub> O <sub>4</sub> Cl               | 211.9876                          | 211.9867                           | 4.47             | Both WTPs       |                                                                   |
| 27  | C <sub>9</sub> H <sub>7</sub> O <sub>4</sub> Cl               | 214.0033                          | 214.0024                           | 4.15             | MH-WTP          | Gonsior et al. (2014)                                             |
| 28  | C <sub>8</sub> H <sub>5</sub> O <sub>5</sub> Cl               | 215.9826                          | 215.9817                           | 4.09             | MH-WTP          | Lavonen et al. (2013), Gonsior et al. (2014), Zhang et al. (2014) |
| 29  | C <sub>9</sub> H <sub>9</sub> O <sub>4</sub> Cl               | 216.0189                          | 216.0183                           | 2.77             | MH-WTP          | Lavonen et al. (2013), Gonsior et al. (2014)                      |
| 30  | C <sub>10</sub> H <sub>13</sub> O <sub>3</sub> Cl             | 216.0553                          | 216.0547                           | 2.70             | MH-WTP          |                                                                   |
| 31  | C <sub>7</sub> H <sub>4</sub> O <sub>4</sub> Cl <sub>2</sub>  | 221.9487                          | 221.9478                           | 3.99             | MH-WTP          | Gonsior et al. (2014), Zhang et al. (2014)                        |
| 32  | C <sub>13</sub> H <sub>15</sub> OCl                           | 222.0811                          | 222.0807                           | 1.95             | BK-WTP          | Zhang et al. (2014)                                               |
| 33  | C <sub>10</sub> H <sub>5</sub> O <sub>4</sub> Cl              | 223.9876                          | 223.9867                           | 4.23             | MH-WTP          | Gonsior et al. (2014), Zhang et al. (2014)                        |
| 34  | C <sub>8</sub> H <sub>9</sub> OCl <sub>3</sub>                | 225.9719                          | 225.9717                           | 0.70             | BK-WTP          | Zhang et al. (2014)                                               |
| 35  | C <sub>11</sub> H <sub>11</sub> O <sub>3</sub> Cl             | 226.0397                          | 226.0391                           | 2.40             | MH-WTP          | Zhang et al. (2014)                                               |
| 36  | C <sub>6</sub> H <sub>6</sub> O <sub>5</sub> Cl <sub>2</sub>  | 227.9592                          | 227.9583                           | 4.00             | MH-WTP          | Zhang et al. (2014)                                               |
| 37  | C <sub>7</sub> H <sub>10</sub> O <sub>4</sub> Cl <sub>2</sub> | 227.9956                          | 227.9948                           | 3.62             | MH-WTP          | Zhang et al. (2014)                                               |
| 38  | C <sub>10</sub> H <sub>9</sub> O <sub>4</sub> Cl              | 228.0189                          | 228.0181                           | 3.50             | MH-WTP          | Gonsior et al. (2014), Zhang et al. (2014)                        |

| No. | DBP formula                                                   | Theoretical molecular weight (Da) | Experimental molecular weight (Da) | Mass error (ppm) | Detected in WTP | Also reported in references |
|-----|---------------------------------------------------------------|-----------------------------------|------------------------------------|------------------|-----------------|-----------------------------|
| 39  | C <sub>10</sub> H <sub>11</sub> O <sub>4</sub> Cl             | 230.0346                          | 230.0337                           | 3.99             | MH-WTP          | Zhang et al. (2014)         |
| 40  | C <sub>3</sub> H <sub>3</sub> O <sub>4</sub> Cl <sub>3</sub>  | 231.9097                          | 231.9089                           | 3.42             | MH-WTP          | Zhang et al. (2014)         |
| 41  | C <sub>8</sub> H <sub>5</sub> O <sub>6</sub> Cl               | 231.9775                          | 231.9764                           | 4.52             | Both WTPs       | Zhang et al. (2014)         |
| 42  | C <sub>10</sub> H <sub>13</sub> O <sub>4</sub> Cl             | 232.0502                          | 232.0495                           | 3.05             | MH-WTP          |                             |
| 43  | C <sub>3</sub> H <sub>3</sub> O <sub>4</sub> Cl <sub>3</sub>  | 233.9253                          | 233.9251                           | 1.21             | MH-WTP          |                             |
| 44  | C <sub>6</sub> H <sub>9</sub> O <sub>3</sub> Cl <sub>3</sub>  | 233.9617                          | 233.9610                           | 3.20             | MH-WTP          |                             |
| 45  | C <sub>8</sub> H <sub>7</sub> O <sub>6</sub> Cl               | 233.9931                          | 233.9924                           | 3.11             | MH-WTP          | Gonsior et al. (2014)       |
| 46  | C <sub>9</sub> H <sub>11</sub> O <sub>5</sub> Cl              | 234.0295                          | 234.0288                           | 2.96             | MH-WTP          |                             |
| 47  | C <sub>10</sub> H <sub>15</sub> O <sub>4</sub> Cl             | 234.0659                          | 234.0659                           | 0.18             | BK-WTP          |                             |
| 48  | C <sub>8</sub> H <sub>9</sub> O <sub>6</sub> Cl               | 236.0088                          | 236.0079                           | 3.85             | MH-WTP          |                             |
| 49  | C <sub>8</sub> H <sub>8</sub> O <sub>4</sub> Cl <sub>2</sub>  | 237.9800                          | 237.9793                           | 2.71             | Both WTPs       |                             |
| 50  | C <sub>7</sub> H <sub>8</sub> O <sub>5</sub> Cl <sub>2</sub>  | 241.9749                          | 241.9740                           | 3.76             | MH-WTP          |                             |
| 51  | C <sub>12</sub> H <sub>12</sub> OCl <sub>2</sub>              | 242.0265                          | 242.0255                           | 4.38             | BK-WTP          |                             |
| 52  | C <sub>7</sub> H <sub>10</sub> O <sub>5</sub> Cl <sub>2</sub> | 243.9905                          | 243.9898                           | 3.16             | BK-WTP          |                             |
| 53  | C <sub>11</sub> H <sub>13</sub> O <sub>4</sub> Cl             | 244.0502                          | 244.0492                           | 4.17             | MH-WTP          | Lavonen et al. (2013)       |
| 54  | C <sub>10</sub> H <sub>11</sub> O <sub>5</sub> Cl             | 246.0295                          | 246.0287                           | 3.39             | MH-WTP          | Lavonen et al. (2013)       |
| 55  | C <sub>7</sub> H <sub>15</sub> O <sub>7</sub> Cl              | 246.0506                          | 246.0509                           | 0.88             | MH-WTP          |                             |
| 56  | C <sub>11</sub> H <sub>15</sub> O <sub>4</sub> Cl             | 246.0659                          | 246.0652                           | 2.71             | MH-WTP          | Lavonen et al. (2013)       |
| 57  | C <sub>9</sub> H <sub>9</sub> O <sub>6</sub> Cl               | 248.0088                          | 248.0080                           | 3.06             | Both WTPs       | Lavonen et al. (2013)       |
| 58  | C <sub>11</sub> H <sub>17</sub> O <sub>4</sub> Cl             | 248.0815                          | 248.0812                           | 1.32             | BK-WTP          |                             |
| 59  | C <sub>8</sub> H <sub>4</sub> O <sub>5</sub> Cl <sub>2</sub>  | 249.9436                          | 249.9448                           | 4.88             | MH-WTP          | Zhang et al. (2014)         |
| 60  | C <sub>9</sub> H <sub>11</sub> O <sub>6</sub> Cl              | 250.0244                          | 250.0238                           | 2.31             | MH-WTP          | Zhang et al. (2014)         |
| 61  | C <sub>10</sub> H <sub>15</sub> O <sub>5</sub> Cl             | 250.0608                          | 250.0601                           | 2.73             | MH-WTP          | Zhang et al. (2014)         |
| 62  | C <sub>8</sub> H <sub>6</sub> O <sub>5</sub> Cl <sub>2</sub>  | 251.9592                          | 251.9582                           | 4.25             | Both WTPs       | Zhang et al. (2014)         |
| 63  | C <sub>7</sub> H <sub>5</sub> O <sub>8</sub> Cl               | 251.9673                          | 251.9673                           | 0.17             | BK-WTP          | Zhang et al. (2014)         |
| 64  | C <sub>9</sub> H <sub>10</sub> O <sub>4</sub> Cl <sub>2</sub> | 251.9956                          | 251.9946                           | 4.03             | MH-WTP          | Zhang et al. (2014)         |
| 65  | C <sub>8</sub> H <sub>8</sub> O <sub>5</sub> Cl <sub>2</sub>  | 253.9749                          | 253.9744                           | 2.09             | MH-WTP          | Zhang et al. (2014)         |
| 66  | C <sub>14</sub> H <sub>3</sub> O <sub>3</sub> Cl              | 253.9771                          | 253.9772                           | 0.58             | MH-WTP          | Zhang et al. (2014)         |
| 67  | C <sub>8</sub> H <sub>11</sub> O <sub>7</sub> Cl              | 254.0193                          | 254.0186                           | 2.73             | MH-WTP          | Zhang et al. (2014)         |
| 68  | C <sub>12</sub> H <sub>11</sub> O <sub>4</sub> Cl             | 254.0346                          | 254.0337                           | 3.42             | MH-WTP          | Zhang et al. (2014)         |
| 69  | C <sub>12</sub> H <sub>13</sub> O <sub>4</sub> Cl             | 256.0502                          | 256.0496                           | 2.37             | MH-WTP          | Zhang et al. (2014)         |
| 70  | C <sub>10</sub> H <sub>7</sub> O <sub>6</sub> Cl              | 257.9931                          | 257.9926                           | 2.20             | MH-WTP          | Lavonen et al. (2013)       |
| 71  | C <sub>11</sub> H <sub>11</sub> O <sub>5</sub> Cl             | 258.0295                          | 258.0287                           | 3.00             | MH-WTP          | Lavonen et al. (2013)       |
| 72  | C <sub>16</sub> H <sub>15</sub> OCl                           | 258.0811                          | 258.0822                           | 4.17             | BK-WTP          |                             |
| 73  | C <sub>6</sub> H <sub>3</sub> O <sub>5</sub> Cl <sub>3</sub>  | 259.9046                          | 259.9038                           | 3.19             | Both WTPs       |                             |
| 74  | C <sub>10</sub> H <sub>6</sub> O <sub>4</sub> Cl <sub>2</sub> | 259.9643                          | 259.9635                           | 3.22             | MH-WTP          | Zhang et al. (2014)         |
| 75  | C <sub>10</sub> H <sub>9</sub> O <sub>6</sub> Cl              | 260.0088                          | 260.0081                           | 2.49             | MH-WTP          | Zhang et al. (2014)         |
| 76  | C <sub>11</sub> H <sub>13</sub> O <sub>5</sub> Cl             | 260.0452                          | 260.0445                           | 2.47             | MH-WTP          | Zhang et al. (2014)         |
| 77  | C <sub>10</sub> H <sub>19</sub> OCl <sub>3</sub>              | 260.0501                          | 260.0490                           | 4.53             | BK-WTP          | Zhang et al. (2014)         |
| 78  | C <sub>9</sub> H <sub>7</sub> O <sub>7</sub> Cl               | 261.9880                          | 261.9876                           | 1.77             | MH-WTP          | Zhang et al. (2014)         |



| No. | DBP formula                                                    | Theoretical molecular weight (Da) | Experimental molecular weight (Da) | Mass error (ppm) | Detected in WTP | Also reported in references                   |
|-----|----------------------------------------------------------------|-----------------------------------|------------------------------------|------------------|-----------------|-----------------------------------------------|
| 79  | C <sub>11</sub> H <sub>15</sub> O <sub>5</sub> Cl              | 262.0608                          | 262.0603                           | 1.96             | MH-WTP          | Zhang et al. (2014)                           |
| 80  | C <sub>6</sub> H <sub>7</sub> O <sub>5</sub> Cl <sub>3</sub>   | 263.9359                          | 263.9352                           | 2.61             | MH-WTP          | Zhang et al. (2014)                           |
| 81  | C <sub>14</sub> H <sub>13</sub> O <sub>3</sub> Cl              | 264.0553                          | 264.0551                           | 0.73             | MH-WTP          | Zhang et al. (2014)                           |
| 82  | C <sub>11</sub> H <sub>17</sub> O <sub>5</sub> Cl              | 264.0765                          | 264.0760                           | 1.64             | MH-WTP          | Zhang et al. (2014)                           |
| 83  | C <sub>9</sub> H <sub>8</sub> O <sub>5</sub> Cl <sub>2</sub>   | 265.9749                          | 265.9741                           | 2.90             | Both WTPs       | Zhang et al. (2014)                           |
| 84  | C <sub>9</sub> H <sub>6</sub> O <sub>6</sub> Cl <sub>2</sub>   | 267.9541                          | 267.9532                           | 3.42             | Both WTPs       | Zhang et al. (2014)                           |
| 85  | C <sub>8</sub> H <sub>9</sub> O <sub>8</sub> Cl                | 267.9986                          | 267.9987                           | 0.34             | BK-WTP          |                                               |
| 86  | C <sub>9</sub> H <sub>13</sub> O <sub>7</sub> Cl               | 268.0350                          | 268.0341                           | 3.22             | MH-WTP          |                                               |
| 87  | C <sub>16</sub> H <sub>27</sub> OCl                            | 270.1750                          | 270.1750                           | 0.31             | BK-WTP          |                                               |
| 88  | C <sub>12</sub> H <sub>13</sub> O <sub>5</sub> Cl              | 272.0452                          | 272.0444                           | 2.69             | MH-WTP          | Lavonen et al. (2013)                         |
| 89  | C <sub>14</sub> H <sub>21</sub> O <sub>5</sub> Cl              | 272.1179                          | 272.1175                           | 1.52             | BK-WTP          |                                               |
| 90  | C <sub>11</sub> H <sub>8</sub> O <sub>4</sub> Cl <sub>2</sub>  | 273.9800                          | 273.9789                           | 3.82             | BK-WTP          | Lavonen et al. (2013), Zhang et al. (2014)    |
| 91  | C <sub>11</sub> H <sub>11</sub> O <sub>6</sub> Cl              | 274.0244                          | 274.0240                           | 1.60             | MH-WTP          | Lavonen et al. (2013)                         |
| 92  | C <sub>12</sub> H <sub>15</sub> O <sub>5</sub> Cl              | 274.0608                          | 274.0600                           | 2.93             | MH-WTP          | Lavonen et al. (2013)                         |
| 93  | C <sub>11</sub> H <sub>21</sub> OCl <sub>3</sub>               | 274.0658                          | 274.0647                           | 3.90             | BK-WTP          |                                               |
| 94  | C <sub>10</sub> H <sub>9</sub> O <sub>7</sub> Cl               | 276.0037                          | 276.0030                           | 2.58             | MH-WTP          | Lavonen et al. (2013), Phungsai et al. (2018) |
| 95  | C <sub>11</sub> H <sub>13</sub> O <sub>6</sub> Cl              | 276.0401                          | 276.0394                           | 2.31             | MH-WTP          | Lavonen et al. (2013), Phungsai et al. (2018) |
| 96  | C <sub>10</sub> H <sub>19</sub> O <sub>2</sub> Cl <sub>3</sub> | 276.0451                          | 276.0440                           | 3.82             | BK-WTP          |                                               |
| 97  | C <sub>13</sub> H <sub>13</sub> O <sub>5</sub> Cl              | 276.0553                          | 276.0551                           | 0.99             | MH-WTP          |                                               |
| 98  | C <sub>12</sub> H <sub>17</sub> O <sub>5</sub> Cl              | 276.0765                          | 276.0759                           | 2.08             | MH-WTP          | Lavonen et al. (2013)                         |
| 99  | C <sub>10</sub> H <sub>11</sub> O <sub>7</sub> Cl              | 278.0193                          | 278.0186                           | 2.49             | Both WTPs       | Lavonen et al. (2013), Phungsai et al. (2018) |
| 100 | C <sub>10</sub> H <sub>13</sub> O <sub>7</sub> Cl              | 280.0350                          | 280.0345                           | 1.72             | MH-WTP          |                                               |
| 101 | C <sub>14</sub> H <sub>13</sub> O <sub>4</sub> Cl              | 280.0502                          | 280.0491                           | 4.10             | Both WTPs       | Lavonen et al. (2013)                         |
| 102 | C <sub>11</sub> H <sub>17</sub> O <sub>6</sub> Cl              | 280.0714                          | 280.0707                           | 2.39             | MH-WTP          | Lavonen et al. (2013)                         |
| 103 | C <sub>17</sub> H <sub>11</sub> O <sub>2</sub> Cl              | 282.0448                          | 282.0442                           | 1.84             | Both WTPs       |                                               |
| 104 | C <sub>11</sub> H <sub>19</sub> O <sub>6</sub> Cl              | 282.0870                          | 282.0864                           | 2.37             | MH-WTP          |                                               |
| 105 | C <sub>11</sub> H <sub>5</sub> O <sub>7</sub> Cl               | 283.9724                          | 283.9712                           | 4.24             | MH-WTP          |                                               |
| 106 | C <sub>12</sub> H <sub>9</sub> O <sub>6</sub> Cl               | 284.0088                          | 284.0075                           | 4.43             | MH-WTP          | Lavonen et al. (2013)                         |
| 107 | C <sub>11</sub> H <sub>15</sub> O <sub>2</sub> Cl <sub>3</sub> | 284.0138                          | 284.0126                           | 4.24             | BK-WTP          |                                               |
| 108 | C <sub>13</sub> H <sub>13</sub> O <sub>5</sub> Cl              | 284.0452                          | 284.0444                           | 2.79             | MH-WTP          | Lavonen et al. (2013)                         |
| 109 | C <sub>8</sub> H <sub>5</sub> O <sub>5</sub> Cl <sub>3</sub>   | 285.9203                          | 285.9192                           | 3.60             | MH-WTP          |                                               |
| 110 | C <sub>9</sub> H <sub>12</sub> O <sub>6</sub> Cl <sub>2</sub>  | 286.0011                          | 286.0004                           | 2.57             | MH-WTP          | Zhang et al. (2014)                           |
| 111 | C <sub>12</sub> H <sub>11</sub> O <sub>6</sub> Cl              | 286.0244                          | 286.0233                           | 3.77             | MH-WTP          | Zhang et al. (2014)                           |
| 112 | C <sub>13</sub> H <sub>15</sub> O <sub>5</sub> Cl              | 286.0608                          | 286.0600                           | 2.88             | MH-WTP          | Zhang et al. (2014)                           |
| 113 | C <sub>10</sub> H <sub>15</sub> O <sub>3</sub> Cl <sub>3</sub> | 288.0087                          | 288.0075                           | 4.23             | BK-WTP          | Zhang et al. (2014)                           |
| 114 | C <sub>12</sub> H <sub>13</sub> O <sub>6</sub> Cl              | 288.0401                          | 288.0392                           | 2.87             | MH-WTP          | Zhang et al. (2014)                           |
| 115 | C <sub>9</sub> H <sub>17</sub> O <sub>8</sub> Cl               | 288.0612                          | 288.0612                           | 0.10             | MH-WTP          | Zhang et al. (2014)                           |
| 116 | C <sub>13</sub> H <sub>17</sub> O <sub>5</sub> Cl              | 288.0765                          | 288.0759                           | 2.02             | BK-WTP          | Zhang et al. (2014)                           |
| 117 | C <sub>10</sub> HO <sub>4</sub> Cl <sub>3</sub>                | 289.8940                          | 289.8927                           | 4.64             | MH-WTP          | Zhang et al. (2014)                           |
| 118 | C <sub>7</sub> H <sub>5</sub> O <sub>6</sub> Cl <sub>3</sub>   | 289.9152                          | 289.9143                           | 3.08             | MH-WTP          | Zhang et al. (2014)                           |

| No. | DBP formula                                                    | Theoretical molecular weight (Da) | Experimental molecular weight (Da) | Mass error (ppm) | Detected in WTP | Also reported in references                 |
|-----|----------------------------------------------------------------|-----------------------------------|------------------------------------|------------------|-----------------|---------------------------------------------|
| 119 | C <sub>11</sub> H <sub>11</sub> O <sub>7</sub> Cl              | 290.0193                          | 290.0185                           | 2.73             | MH-WTP          | Zhang et al. (2014), Phungsai et al. (2018) |
| 120 | C <sub>12</sub> H <sub>15</sub> O <sub>6</sub> Cl              | 290.0557                          | 290.0551                           | 2.30             | MH-WTP          | Zhang et al. (2014)                         |
| 121 | C <sub>13</sub> H <sub>27</sub> O <sub>3</sub> Cl              | 290.1649                          | 290.1663                           | 4.75             | MH-WTP          |                                             |
| 122 | C <sub>11</sub> H <sub>13</sub> O <sub>7</sub> Cl              | 292.0350                          | 292.0343                           | 2.34             | MH-WTP          | Lavonen et al. (2013)                       |
| 123 | C <sub>8</sub> H <sub>17</sub> O <sub>9</sub> Cl               | 292.0561                          | 292.0573                           | 4.20             | MH-WTP          |                                             |
| 124 | C <sub>12</sub> H <sub>17</sub> O <sub>6</sub> Cl              | 292.0714                          | 292.0707                           | 2.39             | Both WTPs       | Lavonen et al. (2013)                       |
| 125 | C <sub>16</sub> H <sub>17</sub> O <sub>3</sub> Cl              | 292.0866                          | 292.0869                           | 1.09             | MH-WTP          |                                             |
| 126 | C <sub>10</sub> H <sub>8</sub> O <sub>6</sub> Cl <sub>2</sub>  | 293.9698                          | 293.9690                           | 2.81             | Both WTPs       | Lavonen et al. (2013), Zhang et al. (2014)  |
| 127 | C <sub>10</sub> H <sub>11</sub> O <sub>8</sub> Cl              | 294.0142                          | 294.0137                           | 1.97             | MH-WTP          |                                             |
| 128 | C <sub>17</sub> H <sub>23</sub> O <sub>3</sub> Cl              | 294.1387                          | 294.1376                           | 3.49             | BK-WTP          |                                             |
| 129 | C <sub>10</sub> H <sub>12</sub> O <sub>6</sub> Cl <sub>2</sub> | 298.0011                          | 298.0003                           | 2.77             | BK-WTP          | Lavonen et al. (2013), Zhang et al. (2014)  |
| 130 | C <sub>13</sub> H <sub>11</sub> O <sub>6</sub> Cl              | 298.0244                          | 298.0231                           | 4.29             | MH-WTP          | Lavonen et al. (2013)                       |
| 131 | C <sub>10</sub> H <sub>14</sub> O <sub>6</sub> Cl <sub>2</sub> | 300.0167                          | 300.0155                           | 4.22             | MH-WTP          | Zhang et al. (2014)                         |
| 132 | C <sub>12</sub> H <sub>11</sub> O <sub>7</sub> Cl              | 302.0193                          | 302.0184                           | 3.19             | Both WTPs       | Zhang et al. (2014)                         |
| 133 | C <sub>12</sub> H <sub>13</sub> O <sub>7</sub> Cl              | 304.0350                          | 304.0343                           | 2.35             | MH-WTP          | Zhang et al. (2014)                         |
| 134 | C <sub>13</sub> H <sub>17</sub> O <sub>6</sub> Cl              | 304.0714                          | 304.0706                           | 2.66             | MH-WTP          | Zhang et al. (2014)                         |
| 135 | C <sub>11</sub> H <sub>22</sub> O <sub>3</sub> Cl <sub>2</sub> | 304.0844                          | 304.0833                           | 3.82             | BK-WTP          | Zhang et al. (2014)                         |
| 136 | C <sub>14</sub> H <sub>21</sub> O <sub>5</sub> Cl              | 304.1078                          | 304.1070                           | 2.38             | MH-WTP          | Zhang et al. (2014)                         |
| 137 | C <sub>11</sub> H <sub>8</sub> O <sub>6</sub> Cl <sub>2</sub>  | 305.9698                          | 305.9687                           | 3.58             | MH-WTP          | Zhang et al. (2014)                         |
| 138 | C <sub>11</sub> H <sub>11</sub> O <sub>8</sub> Cl              | 306.0142                          | 306.0137                           | 1.73             | MH-WTP          | Zhang et al. (2014)                         |
| 139 | C <sub>9</sub> H <sub>16</sub> O <sub>7</sub> Cl <sub>2</sub>  | 306.0273                          | 306.0288                           | 5.00             | BK-WTP          | Zhang et al. (2014)                         |
| 140 | C <sub>12</sub> H <sub>17</sub> O <sub>7</sub> Cl              | 308.0663                          | 308.0653                           | 3.35             | MH-WTP          | Zhang et al. (2014)                         |
| 141 | C <sub>10</sub> H <sub>8</sub> O <sub>7</sub> Cl <sub>2</sub>  | 309.9647                          | 309.9637                           | 3.29             | MH-WTP          | Zhang et al. (2014)                         |
| 142 | C <sub>18</sub> H <sub>11</sub> O <sub>3</sub> Cl              | 310.0397                          | 310.0412                           | 4.93             | BK-WTP          |                                             |
| 143 | C <sub>17</sub> H <sub>23</sub> O <sub>3</sub> Cl              | 310.1336                          | 310.1333                           | 0.78             | BK-WTP          |                                             |
| 144 | C <sub>13</sub> H <sub>22</sub> O <sub>4</sub> Cl <sub>2</sub> | 312.0895                          | 312.0888                           | 2.39             | BK-WTP          |                                             |
| 145 | C <sub>10</sub> H <sub>12</sub> O <sub>7</sub> Cl <sub>2</sub> | 313.9960                          | 313.9967                           | 2.10             | MH-WTP          | Zhang et al. (2014)                         |
| 146 | C <sub>13</sub> H <sub>21</sub> O <sub>2</sub> Cl <sub>3</sub> | 314.0607                          | 314.0600                           | 2.40             | BK-WTP          | Zhang et al. (2014)                         |
| 147 | C <sub>10</sub> H <sub>11</sub> O <sub>5</sub> Cl <sub>3</sub> | 315.9672                          | 315.9663                           | 2.91             | MH-WTP          | Zhang et al. (2014)                         |
| 148 | C <sub>10</sub> H <sub>14</sub> O <sub>7</sub> Cl <sub>2</sub> | 316.0117                          | 316.0107                           | 3.07             | MH-WTP          | Zhang et al. (2014)                         |
| 149 | C <sub>13</sub> H <sub>13</sub> O <sub>7</sub> Cl              | 316.0350                          | 316.0341                           | 2.95             | MH-WTP          | Zhang et al. (2014)                         |
| 150 | C <sub>14</sub> H <sub>17</sub> O <sub>6</sub> Cl              | 316.0714                          | 316.0708                           | 1.67             | MH-WTP          | Zhang et al. (2014)                         |
| 151 | C <sub>11</sub> H <sub>4</sub> O <sub>7</sub> Cl <sub>2</sub>  | 317.9334                          | 317.9324                           | 3.05             | MH-WTP          | Zhang et al. (2014)                         |
| 152 | C <sub>12</sub> H <sub>11</sub> O <sub>8</sub> Cl              | 318.0142                          | 318.0136                           | 2.01             | MH-WTP          | Zhang et al. (2014)                         |
| 153 | C <sub>9</sub> H <sub>15</sub> O <sub>10</sub> Cl              | 318.0354                          | 318.0366                           | 3.84             | BK-WTP          | Zhang et al. (2014)                         |
| 154 | C <sub>13</sub> H <sub>15</sub> O <sub>7</sub> Cl              | 318.0506                          | 318.0496                           | 3.15             | MH-WTP          | Zhang et al. (2014), Phungsai et al. (2018) |
| 155 | C <sub>14</sub> H <sub>19</sub> O <sub>6</sub> Cl              | 318.0870                          | 318.0860                           | 3.11             | MH-WTP          | Zhang et al. (2014)                         |
| 156 | C <sub>13</sub> H <sub>23</sub> O <sub>3</sub> Cl              | 318.1234                          | 318.1228                           | 2.02             | BK-WTP          | Lavonen et al. (2013)                       |
| 157 | C <sub>8</sub> H <sub>7</sub> O <sub>7</sub> Cl <sub>3</sub>   | 319.9257                          | 319.9245                           | 3.78             | MH-WTP          |                                             |
| 158 | C <sub>11</sub> H <sub>6</sub> O <sub>7</sub> Cl <sub>2</sub>  | 319.9491                          | 319.9479                           | 3.50             | MH-WTP          | Lavonen et al. (2013), Zhang et al. (2014)  |

| No. | DBP formula                                                    | Theoretical molecular weight (Da) | Experimental molecular weight (Da) | Mass error (ppm) | Detected in WTP | Also reported in references                   |
|-----|----------------------------------------------------------------|-----------------------------------|------------------------------------|------------------|-----------------|-----------------------------------------------|
| 159 | C <sub>12</sub> H <sub>13</sub> O <sub>8</sub> Cl              | 320.0299                          | 320.0304                           | 1.41             | MH-WTP          | Lavonen et al. (2013), Phungsai et al. (2018) |
| 160 | C <sub>11</sub> H <sub>19</sub> O <sub>4</sub> Cl <sub>3</sub> | 320.0349                          | 320.0342                           | 2.26             | BK-WTP          |                                               |
| 161 | C <sub>12</sub> H <sub>23</sub> O <sub>3</sub> Cl <sub>3</sub> | 320.0713                          | 320.0704                           | 2.72             | BK-WTP          |                                               |
| 162 | C <sub>10</sub> H <sub>4</sub> O <sub>8</sub> Cl <sub>2</sub>  | 321.9283                          | 321.9272                           | 3.37             | BK-WTP          |                                               |
| 163 | C <sub>11</sub> H <sub>8</sub> O <sub>7</sub> Cl <sub>2</sub>  | 321.9647                          | 321.9633                           | 4.51             | MH-WTP          | Lavonen et al. (2013), Zhang et al. (2014)    |
| 164 | C <sub>12</sub> H <sub>15</sub> O <sub>8</sub> Cl              | 322.0455                          | 322.0456                           | 0.01             | MH-WTP          | Lavonen et al. (2013)                         |
| 165 | C <sub>12</sub> H <sub>17</sub> O <sub>8</sub> Cl              | 324.0612                          | 324.0603                           | 2.83             | MH-WTP          | Lavonen et al. (2013)                         |
| 166 | C <sub>10</sub> H <sub>8</sub> O <sub>8</sub> Cl <sub>2</sub>  | 325.9596                          | 325.9596                           | 0.05             | Both WTPs       |                                               |
| 167 | C <sub>12</sub> H <sub>5</sub> O <sub>9</sub> Cl               | 327.9622                          | 327.9614                           | 2.45             | MH-WTP          | Lavonen et al. (2013)                         |
| 168 | C <sub>13</sub> H <sub>17</sub> O <sub>6</sub> Cl              | 328.0714                          | 328.0706                           | 2.43             | MH-WTP          | Lavonen et al. (2013)                         |
| 169 | C <sub>16</sub> H <sub>21</sub> O <sub>5</sub> Cl              | 328.1078                          | 328.1071                           | 1.90             | BK-WTP          | Lavonen et al. (2013)                         |
| 170 | C <sub>11</sub> H <sub>19</sub> O <sub>9</sub> Cl              | 330.0718                          | 330.0731                           | 4.02             | BK-WTP          |                                               |
| 171 | C <sub>13</sub> H <sub>19</sub> O <sub>6</sub> Cl              | 330.0870                          | 330.0861                           | 2.66             | MH-WTP          | Lavonen et al. (2013)                         |
| 172 | C <sub>12</sub> H <sub>9</sub> O <sub>9</sub> Cl               | 331.9935                          | 331.9922                           | 3.86             | BK-WTP          | Lavonen et al. (2013)                         |
| 173 | C <sub>14</sub> H <sub>17</sub> O <sub>7</sub> Cl              | 332.0663                          | 332.0656                           | 2.15             | MH-WTP          | Lavonen et al. (2013)                         |
| 174 | C <sub>19</sub> H <sub>18</sub> OCl <sub>2</sub>               | 332.0735                          | 332.0736                           | 0.39             | BK-WTP          |                                               |
| 175 | C <sub>15</sub> H <sub>21</sub> O <sub>6</sub> Cl              | 332.1027                          | 332.1016                           | 3.10             | MH-WTP          | Lavonen et al. (2013)                         |
| 176 | C <sub>14</sub> H <sub>27</sub> O <sub>2</sub> Cl <sub>3</sub> | 332.1077                          | 332.1069                           | 2.30             | BK-WTP          |                                               |
| 177 | C <sub>12</sub> H <sub>25</sub> O <sub>8</sub> Cl              | 332.1238                          | 332.1252                           | 4.19             | MH-WTP          |                                               |
| 178 | C <sub>8</sub> H <sub>5</sub> O <sub>8</sub> Cl <sub>3</sub>   | 333.9050                          | 333.9036                           | 4.08             | BK-WTP          |                                               |
| 179 | C <sub>12</sub> H <sub>5</sub> O <sub>5</sub> Cl <sub>3</sub>  | 333.9203                          | 333.9219                           | 4.97             | MH-WTP          |                                               |
| 180 | C <sub>10</sub> H <sub>19</sub> O <sub>10</sub> Cl             | 334.0667                          | 334.0680                           | 3.90             | BK-WTP          |                                               |
| 181 | C <sub>15</sub> H <sub>20</sub> O <sub>4</sub> Cl <sub>2</sub> | 334.0739                          | 334.0728                           | 3.13             | BK-WTP          |                                               |
| 182 | C <sub>12</sub> H <sub>10</sub> O <sub>7</sub> Cl <sub>2</sub> | 335.9804                          | 335.9791                           | 3.66             | MH-WTP          | Lavonen et al. (2013), Zhang et al. (2014)    |
| 183 | C <sub>12</sub> H <sub>13</sub> O <sub>9</sub> Cl              | 336.0248                          | 336.0245                           | 0.96             | MH-WTP          | Lavonen et al. (2013)                         |
| 184 | C <sub>14</sub> H <sub>21</sub> O <sub>7</sub> Cl              | 336.0976                          | 336.0971                           | 1.41             | Both WTPs       | Lavonen et al. (2013)                         |
| 185 | C <sub>11</sub> H <sub>8</sub> O <sub>8</sub> Cl <sub>2</sub>  | 337.9596                          | 337.9585                           | 3.33             | MH-WTP          | Zhang et al. (2014)                           |
| 186 | C <sub>14</sub> H <sub>23</sub> O <sub>7</sub> Cl              | 338.1132                          | 338.1120                           | 3.65             | Both WTPs       | Zhang et al. (2014)                           |
| 187 | C <sub>11</sub> H <sub>10</sub> O <sub>8</sub> Cl <sub>2</sub> | 339.9753                          | 339.9739                           | 4.05             | Both WTPs       | Zhang et al. (2014)                           |
| 188 | C <sub>12</sub> H <sub>14</sub> O <sub>7</sub> Cl <sub>2</sub> | 340.0117                          | 340.0105                           | 3.30             | Both WTPs       | Zhang et al. (2014)                           |
| 189 | C <sub>11</sub> H <sub>13</sub> O <sub>10</sub> Cl             | 340.0197                          | 340.0206                           | 2.65             | MH-WTP          | Zhang et al. (2014)                           |
| 190 | C <sub>10</sub> H <sub>8</sub> O <sub>9</sub> Cl <sub>2</sub>  | 341.9545                          | 341.9536                           | 2.78             | MH-WTP          | Zhang et al. (2014)                           |
| 191 | C <sub>16</sub> H <sub>19</sub> O <sub>6</sub> Cl              | 342.0870                          | 342.0866                           | 1.34             | Both WTPs       | Zhang et al. (2014)                           |
| 192 | C <sub>14</sub> H <sub>23</sub> O <sub>3</sub> Cl <sub>3</sub> | 344.0713                          | 344.0707                           | 1.65             | BK-WTP          | Zhang et al. (2014)                           |
| 193 | C <sub>14</sub> H <sub>15</sub> O <sub>8</sub> Cl              | 346.0455                          | 346.0448                           | 2.19             | MH-WTP          | Zhang et al. (2014)                           |
| 194 | C <sub>18</sub> H <sub>15</sub> O <sub>5</sub> Cl              | 346.0608                          | 346.0624                           | 4.61             | MH-WTP          | Zhang et al. (2014)                           |
| 195 | C <sub>13</sub> H <sub>19</sub> O <sub>7</sub> Cl              | 346.0819                          | 346.0810                           | 2.72             | MH-WTP          | Zhang et al. (2014)                           |
| 196 | C <sub>16</sub> H <sub>23</sub> O <sub>6</sub> Cl              | 346.1183                          | 346.1176                           | 2.07             | MH-WTP          | Lavonen et al. (2013)                         |
| 197 | C <sub>15</sub> H <sub>15</sub> O <sub>3</sub> Cl <sub>3</sub> | 348.0087                          | 348.0104                           | 4.95             | MH-WTP          |                                               |
| 198 | C <sub>16</sub> H <sub>27</sub> O <sub>6</sub> Cl              | 350.1496                          | 350.1490                           | 1.79             | MH-WTP          | Lavonen et al. (2013)                         |

| No. | DBP formula                                                    | Theoretical molecular weight (Da) | Experimental molecular weight (Da) | Mass error (ppm) | Detected in WTP | Also reported in references                |
|-----|----------------------------------------------------------------|-----------------------------------|------------------------------------|------------------|-----------------|--------------------------------------------|
| 199 | C <sub>12</sub> H <sub>10</sub> O <sub>8</sub> Cl <sub>2</sub> | 351.9753                          | 351.9739                           | 3.82             | MH-WTP          | Lavonen et al. (2013), Zhang et al. (2014) |
| 200 | C <sub>13</sub> H <sub>14</sub> O <sub>7</sub> Cl <sub>2</sub> | 352.0117                          | 352.0111                           | 1.51             | MH-WTP          | Lavonen et al. (2013), Zhang et al. (2014) |
| 201 | C <sub>12</sub> H <sub>23</sub> O <sub>5</sub> Cl <sub>3</sub> | 352.0611                          | 352.0604                           | 2.16             | BK-WTP          |                                            |
| 202 | C <sub>11</sub> H <sub>5</sub> O <sub>7</sub> Cl <sub>3</sub>  | 353.9101                          | 353.9089                           | 3.30             | MH-WTP          |                                            |
| 203 | C <sub>14</sub> H <sub>23</sub> O <sub>8</sub> Cl              | 354.1081                          | 354.1075                           | 1.75             | MH-WTP          |                                            |
| 204 | C <sub>12</sub> H <sub>14</sub> O <sub>8</sub> Cl <sub>2</sub> | 356.0066                          | 356.0059                           | 1.81             | MH-WTP          | Lavonen et al. (2013), Zhang et al. (2014) |
| 205 | C <sub>16</sub> H <sub>19</sub> O <sub>7</sub> Cl              | 358.0819                          | 358.0811                           | 2.44             | MH-WTP          | Lavonen et al. (2013)                      |
| 206 | C <sub>17</sub> H <sub>23</sub> O <sub>6</sub> Cl              | 358.1183                          | 358.1171                           | 3.48             | MH-WTP          | Lavonen et al. (2013)                      |
| 207 | C <sub>16</sub> H <sub>21</sub> O <sub>7</sub> Cl              | 360.0976                          | 360.0968                           | 2.26             | MH-WTP          | Lavonen et al. (2013)                      |
| 208 | C <sub>19</sub> H <sub>30</sub> O <sub>2</sub> Cl <sub>2</sub> | 360.1623                          | 360.1624                           | 0.34             | MH-WTP          |                                            |
| 209 | C <sub>15</sub> H <sub>19</sub> O <sub>8</sub> Cl              | 362.0768                          | 362.0760                           | 2.26             | MH-WTP          | Lavonen et al. (2013)                      |
| 210 | C <sub>18</sub> H <sub>31</sub> O <sub>5</sub> Cl              | 362.1860                          | 362.1852                           | 2.13             | MH-WTP          |                                            |
| 211 | C <sub>14</sub> H <sub>14</sub> O <sub>7</sub> Cl <sub>2</sub> | 364.0117                          | 364.0112                           | 1.38             | MH-WTP          | Lavonen et al. (2013), Zhang et al. (2014) |
| 212 | C <sub>18</sub> H <sub>17</sub> O <sub>6</sub> Cl              | 364.0714                          | 364.0723                           | 2.56             | MH-WTP          | Lavonen et al. (2013)                      |
| 213 | C <sub>13</sub> H <sub>21</sub> O <sub>8</sub> Cl              | 364.0925                          | 364.0912                           | 3.46             | MH-WTP          | Lavonen et al. (2013)                      |
| 214 | C <sub>16</sub> H <sub>21</sub> O <sub>3</sub> Cl <sub>3</sub> | 366.0556                          | 366.0551                           | 1.53             | MH-WTP          |                                            |
| 215 | C <sub>14</sub> H <sub>19</sub> O <sub>9</sub> Cl              | 366.0718                          | 366.0705                           | 3.50             | MH-WTP          | Lavonen et al. (2013)                      |
| 216 | C <sub>17</sub> H <sub>17</sub> O <sub>7</sub> Cl              | 368.0663                          | 368.0653                           | 2.75             | MH-WTP          | Lavonen et al. (2013)                      |
| 217 | C <sub>13</sub> H <sub>25</sub> O <sub>8</sub> Cl              | 368.1238                          | 368.1226                           | 3.25             | MH-WTP          |                                            |
| 218 | C <sub>16</sub> H <sub>29</sub> O <sub>7</sub> Cl              | 368.1602                          | 368.1596                           | 1.53             | MH-WTP          |                                            |
| 219 | C <sub>20</sub> H <sub>29</sub> O <sub>4</sub> Cl              | 368.1754                          | 368.1760                           | 1.42             | BK-WTP          | Lavonen et al. (2013)                      |
| 220 | C <sub>14</sub> H <sub>17</sub> O <sub>5</sub> Cl <sub>3</sub> | 370.0142                          | 370.0136                           | 1.65             | BK-WTP          |                                            |
| 221 | C <sub>16</sub> H <sub>25</sub> O <sub>3</sub> Cl <sub>3</sub> | 370.0869                          | 370.0870                           | 0.08             | MH-WTP          |                                            |
| 222 | C <sub>17</sub> H <sub>33</sub> O <sub>2</sub> Cl <sub>3</sub> | 374.1546                          | 374.1549                           | 0.79             | MH-WTP          |                                            |
| 223 | C <sub>15</sub> H <sub>27</sub> O <sub>4</sub> Cl <sub>3</sub> | 376.0975                          | 376.0971                           | 0.97             | BK-WTP          |                                            |
| 224 | C <sub>17</sub> H <sub>25</sub> O <sub>7</sub> Cl              | 376.1289                          | 376.1275                           | 3.81             | MH-WTP          | Lavonen et al. (2013)                      |
| 225 | C <sub>16</sub> H <sub>31</sub> O <sub>3</sub> Cl <sub>3</sub> | 376.1339                          | 376.1332                           | 1.78             | BK-WTP          |                                            |
| 226 | C <sub>16</sub> H <sub>23</sub> O <sub>8</sub> Cl              | 378.1081                          | 378.1070                           | 3.06             | MH-WTP          | Lavonen et al. (2013)                      |
| 227 | C <sub>16</sub> H <sub>27</sub> O <sub>4</sub> Cl <sub>3</sub> | 388.0975                          | 388.0976                           | 0.20             | MH-WTP          |                                            |
| 228 | C <sub>11</sub> H <sub>15</sub> O <sub>13</sub> Cl             | 390.0201                          | 390.0205                           | 1.02             | MH-WTP          |                                            |
| 229 | C <sub>17</sub> H <sub>33</sub> O <sub>3</sub> Cl <sub>3</sub> | 390.1495                          | 390.1495                           | 0.07             | BK-WTP          |                                            |
| 230 | C <sub>15</sub> H <sub>31</sub> O <sub>9</sub> Cl              | 390.1657                          | 390.1670                           | 3.43             | MH-WTP          |                                            |
| 231 | C <sub>14</sub> H <sub>29</sub> O <sub>10</sub> Cl             | 392.1449                          | 392.1458                           | 2.20             | Both WTPs       |                                            |
| 232 | C <sub>17</sub> H <sub>27</sub> O <sub>8</sub> Cl              | 394.1394                          | 394.1387                           | 1.92             | MH-WTP          | Lavonen et al. (2013)                      |
| 233 | C <sub>21</sub> H <sub>40</sub> O <sub>2</sub> Cl <sub>2</sub> | 394.2405                          | 394.2406                           | 0.26             | BK-WTP          |                                            |
| 234 | C <sub>12</sub> H <sub>5</sub> O <sub>9</sub> Cl <sub>3</sub>  | 397.8999                          | 397.8986                           | 3.39             | MH-WTP          |                                            |
| 235 | C <sub>18</sub> H <sub>29</sub> O <sub>3</sub> Cl <sub>3</sub> | 398.1182                          | 398.1176                           | 1.53             | MH-WTP          |                                            |
| 236 | C <sub>22</sub> H <sub>21</sub> OCl <sub>3</sub>               | 406.0658                          | 406.0651                           | 1.65             | MH-WTP          |                                            |
| 237 | C <sub>14</sub> H <sub>27</sub> O <sub>11</sub> Cl             | 406.1242                          | 406.1254                           | 3.05             | Both WTPs       |                                            |
| 238 | C <sub>17</sub> H <sub>33</sub> O <sub>4</sub> Cl <sub>3</sub> | 406.1444                          | 406.1442                           | 0.70             | BK-WTP          |                                            |

| No. | DBP formula                                                     | Theoretical molecular weight (Da) | Experimental molecular weight (Da) | Mass error (ppm) | Detected in WTP | Also reported in references |
|-----|-----------------------------------------------------------------|-----------------------------------|------------------------------------|------------------|-----------------|-----------------------------|
| 239 | C <sub>12</sub> H <sub>20</sub> O <sub>11</sub> Cl <sub>2</sub> | 410.0383                          | 410.0394                           | 2.75             | BK-WTP          |                             |
| 240 | C <sub>17</sub> H <sub>25</sub> O <sub>5</sub> Cl <sub>3</sub>  | 414.0768                          | 414.0756                           | 2.70             | Both WTPs       |                             |
| 241 | C <sub>24</sub> H <sub>24</sub> O <sub>2</sub> Cl <sub>2</sub>  | 414.1153                          | 414.1135                           | 4.34             | MH-WTP          |                             |
| 242 | C <sub>18</sub> H <sub>35</sub> O <sub>4</sub> Cl <sub>3</sub>  | 418.1444                          | 418.1452                           | 1.69             | BK-WTP          |                             |
| 243 | C <sub>18</sub> H <sub>35</sub> O <sub>4</sub> Cl <sub>3</sub>  | 420.1601                          | 420.1603                           | 0.59             | BK-WTP          |                             |
| 244 | C <sub>13</sub> H <sub>19</sub> O <sub>14</sub> Cl              | 434.0463                          | 434.0470                           | 1.55             | BK-WTP          |                             |
| 245 | C <sub>26</sub> H <sub>26</sub> O <sub>3</sub> Cl <sub>2</sub>  | 456.1259                          | 456.1252                           | 1.47             | MH-WTP          |                             |
| 246 | C <sub>19</sub> H <sub>29</sub> O <sub>6</sub> Cl <sub>3</sub>  | 458.1030                          | 458.1043                           | 2.92             | Both WTPs       |                             |
| 247 | C <sub>24</sub> H <sub>23</sub> O <sub>7</sub> Cl               | 458.1132                          | 458.1116                           | 3.48             | BK-WTP          |                             |
| 248 | C <sub>24</sub> H <sub>24</sub> O <sub>5</sub> Cl <sub>2</sub>  | 462.1001                          | 462.0985                           | 3.33             | BK-WTP          |                             |
| 249 | C <sub>21</sub> H <sub>35</sub> O <sub>5</sub> Cl <sub>3</sub>  | 472.1550                          | 472.1563                           | 2.67             | MH-WTP          |                             |
| 250 | C <sub>15</sub> H <sub>21</sub> O <sub>15</sub> Cl              | 476.0569                          | 476.0579                           | 2.05             | MH-WTP          |                             |
| 251 | C <sub>21</sub> H <sub>33</sub> O <sub>6</sub> Cl <sub>3</sub>  | 486.1343                          | 486.1356                           | 2.73             | MH-WTP          |                             |
| 252 | C <sub>21</sub> H <sub>29</sub> O <sub>7</sub> Cl <sub>3</sub>  | 498.0979                          | 498.0997                           | 3.64             | BK-WTP          |                             |

## References

- E. E. Lavonen, M. Gonsior, L. J. Tranvik, P. Schmitt-Kopplin and S. J. Kohler, Selective chlorination of natural organic matter: identification of previously unknown disinfection byproducts, *Environ Sci Technol*, 2013, 47, 2264-2271.
- H. Zhang, Y. Zhang, Q. Shi, H. Zheng and M. Yang, Characterization of unknown brominated disinfection byproducts during chlorination using ultrahigh resolution mass spectrometry, *Environ Sci Technol*, 2014, 48, 3112-3119.
- M. Gonsior, P. Schmitt-Kopplin, H. Stavklint, S. D. Richardson, N. Hertkorn and D. Bastviken, Changes in dissolved organic matter during the treatment processes of a drinking water plant in Sweden and formation of previously unknown disinfection byproducts, *Environ Sci Technol*, 2014, 48, 12714-12722.
- P. Phungsai, F. Kurisu, I. Kasuga and H. Furumai, Changes in Dissolved Organic Matter Composition and Disinfection Byproduct Precursors in Advanced Drinking Water Treatment Processes, *Environmental Science & Technology*, 2018, 52, 3392-3401.
